# Supplementary material for: Coronavirus Disease Pandemic (COVID-19): Challenges and a Global Perspective
Source: MDPI journal article supplement (doi:10.3390/pathogens9070519), 2020-06-28
Supplement: s1 [file s1]

**Supplementary Table 1:** The functions of non-structural proteins in a typical coronavirus and SARS-CoV-2 (predicted by bioinformatics tools).

| Non-Structural proteins | Functions of NSP in a Typical CoV                                                               | Functions of NSP in SARS-CoV-2                            |
|-------------------------|-------------------------------------------------------------------------------------------------|-----------------------------------------------------------|
| nsp1                    | Cellular mRNA degradation, inhibiting IFN signaling                                             | Suppress antiviral host response                          |
| nsp2                    | Unknown                                                                                         | Unknown                                                   |
| nsp3                    | PLP, polypeptides cleaving, blocking host innate immune response, promoting cytokine expression | Putative PL-pro domain                                    |
| nsp4                    | DMV (double-membrane vesicle) formation                                                         | Complex with nsp3 and 6: DMV formation                    |
| nsp5                    | 3CLpro, Mpro, polypeptides cleaving, inhibiting IFN signaling                                   | 3CL-pro domain                                            |
| nsp6                    | Restricting autophagosome expansion, DMV formation                                              | Complex with nsp3 and 4: DMV formation                    |
| nsp7                    | Cofactor with nsp8 and nsp12                                                                    | Complex with nsp8: primase                                |
| nsp8                    | Cofactor with nsp7 and nsp12, primase                                                           | Complex with nsp7: primase                                |
| nsp9                    | Dimerization and RNA binding                                                                    | RNA/DNA binding activity                                  |
| nsp10                   | Scaffold protein for nsp14 and nsp16                                                            | Complex with nsp14: replication fidelity                  |
| nsp11                   | Unknown                                                                                         | Short peptide at the end of orf1a (2019-nCoV HKU-SZ-005b) |
| nsp12                   | Primer dependent RdRp                                                                           | RNA-dependent RNA polymerase                              |
| nsp13                   | RNA helicase, 5'triphosphatase                                                                  | Helicase                                                  |
| nsp14                   | Exoribonuclease, N7-MTase                                                                       | ExoN: 3'–5' exonuclease                                   |
| nsp15                   | Endoribonuclease, evasion of dsRNA sensors                                                      | XendoU: poly(U)-specific endoribonuclease                 |
| nsp16                   | 2'-O-MTase; avoiding MDA5 recognition, negatively regulating innate immunity                    | 2'-O-MT: 2'-O-ribose methyltransferase                    |
